# Supplementary material for: Reward Sensitivity Enhances Ventrolateral Prefrontal Cortex Activation during Free Choice
Source: PubMed Central journal article supplement (PMC5114280; doi:10.3389/fnins.2016.00529), 2016-11-18
Supplement: Image1.pdf [file Image1.pdf]

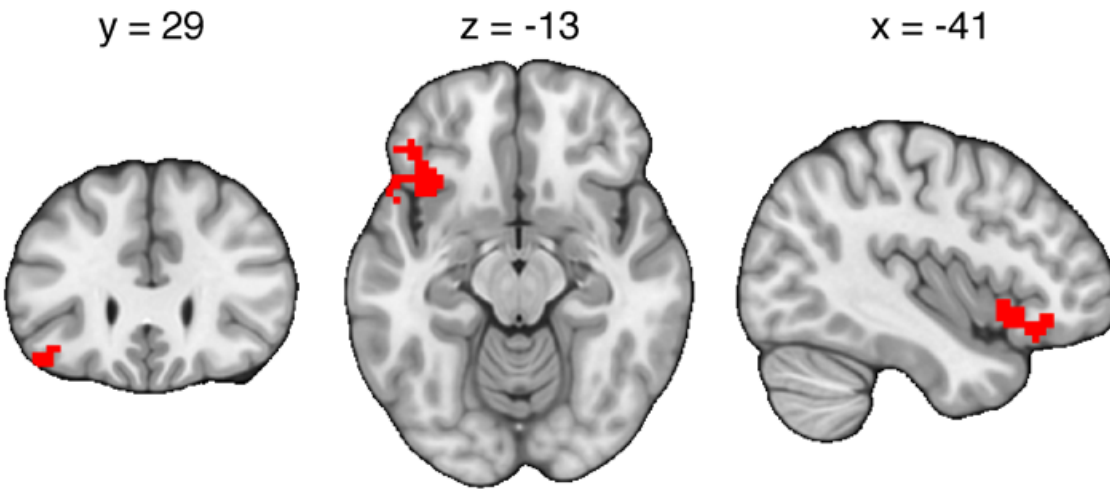

**Supplementary figure 1. Slice images of activation patterns that show a positive relationship with reward sensitivity during free choice**
