# Supplementary material for: Reward Sensitivity Enhances Ventrolateral Prefrontal Cortex Activation during Free Choice
Source: PubMed Central journal article supplement (PMC5114280; doi:10.3389/fnins.2016.00529), 2016-11-18
Supplement: Image2.pdf [file Image2.pdf]

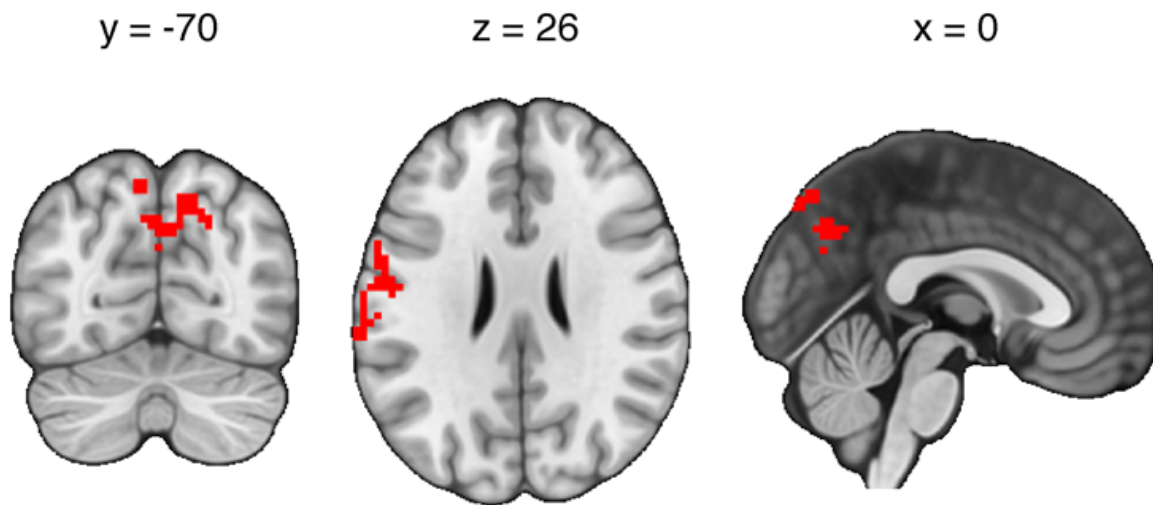

**Supplementary figure 2. Slice images of activation maps resulting from psychophysiological interaction (PPI) analysis with ventrolateral prefrontal cortex seed as a function of reward sensitivity**
